# Supplementary material
Source: publisher site journal article supplement (https://www.dovepress.com/article/431723)

16 Figure S1: Number of progressing eyes in each group having IOP spikes or fluctuations after surgery.

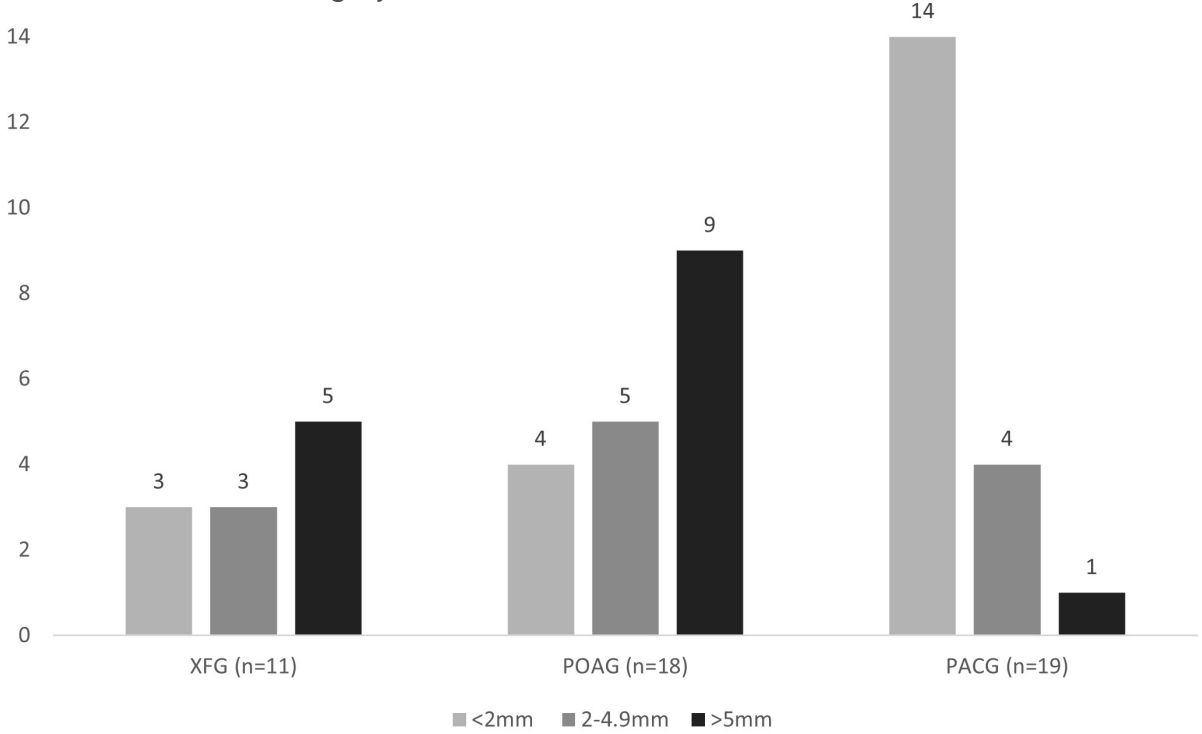

Supplement: Supplementary file 1 [file get_supplementary_file.php]
